# Supplementary material for: α-Mangostin Alleviated Inflammation in Rats With Adjuvant-Induced Arthritis by Disrupting Adipocytes-Mediated Metabolism-Immune Feedback
Source: Frontiers journal article supplement (doi:10.3389/fphar.2021.692806), 2021-07-07

Figure 4

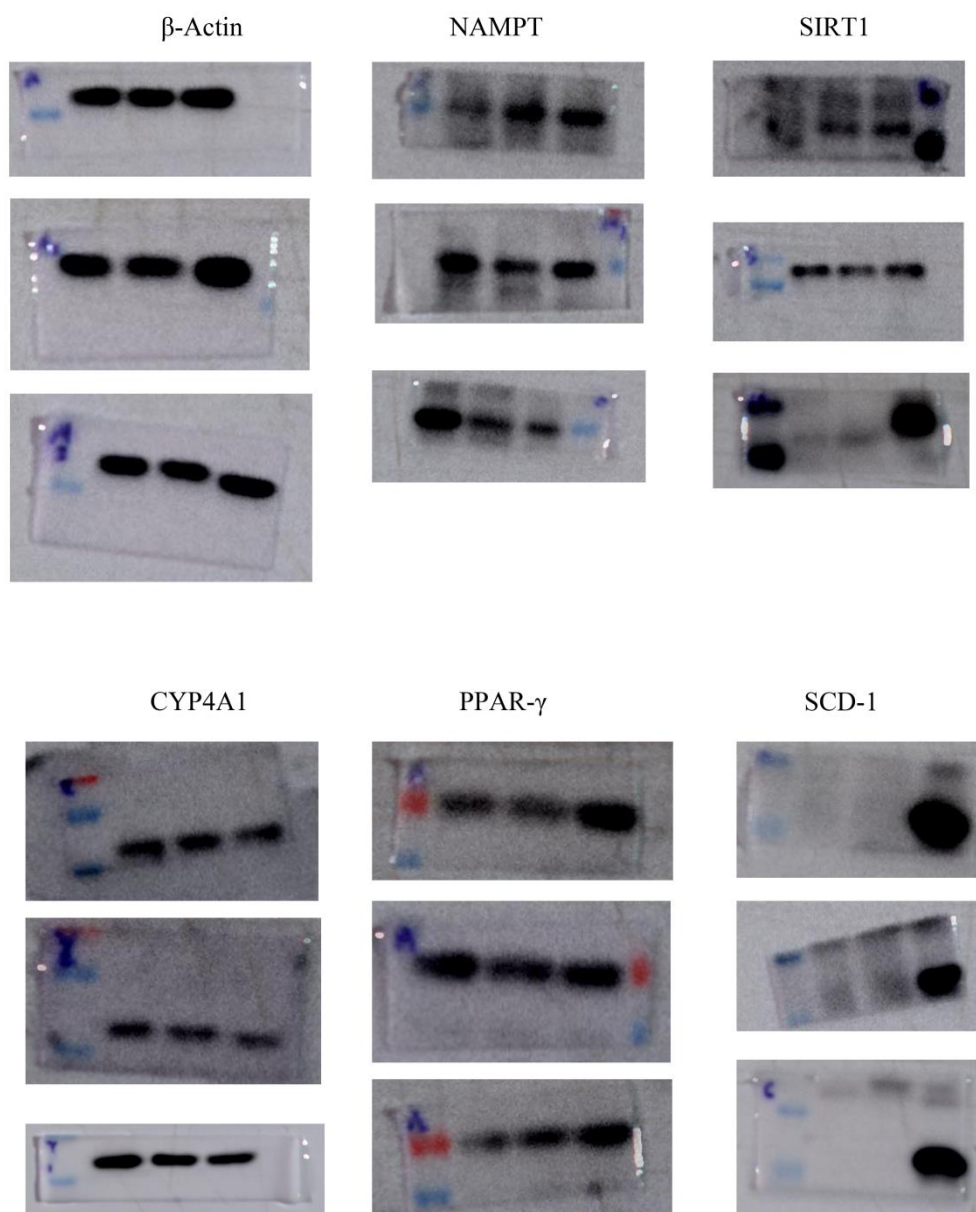

Figure 6

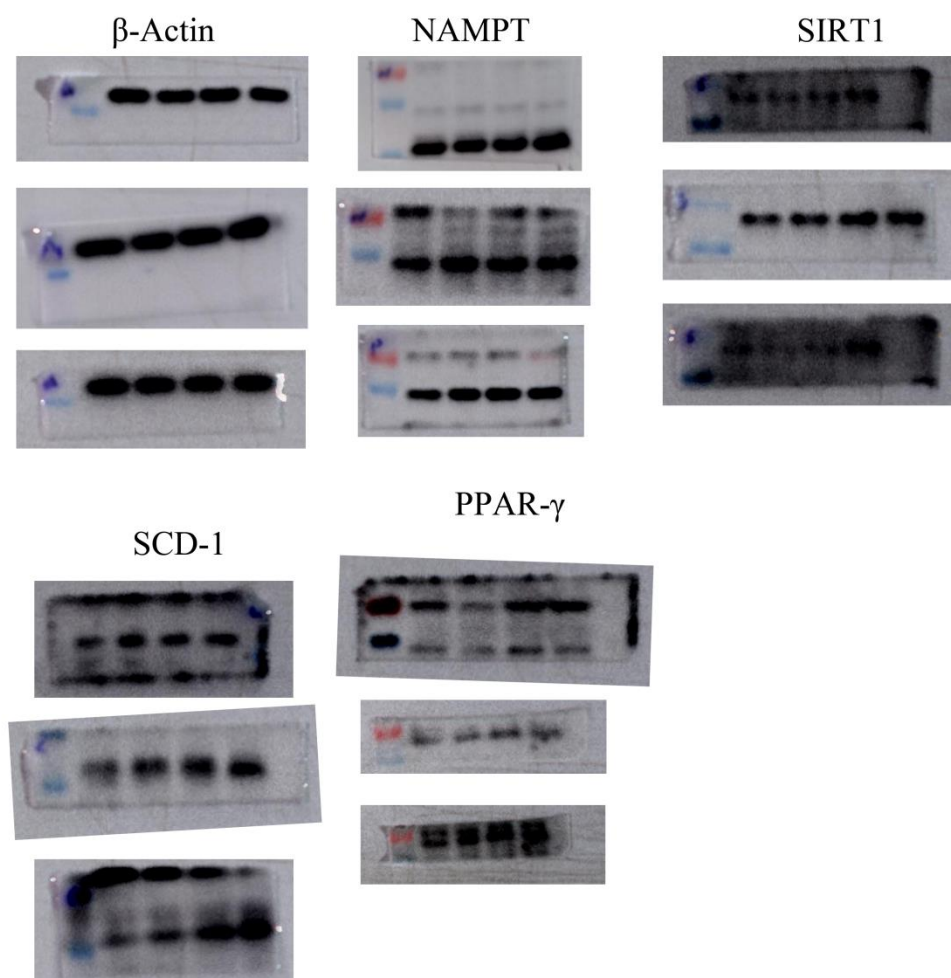

Figure 7

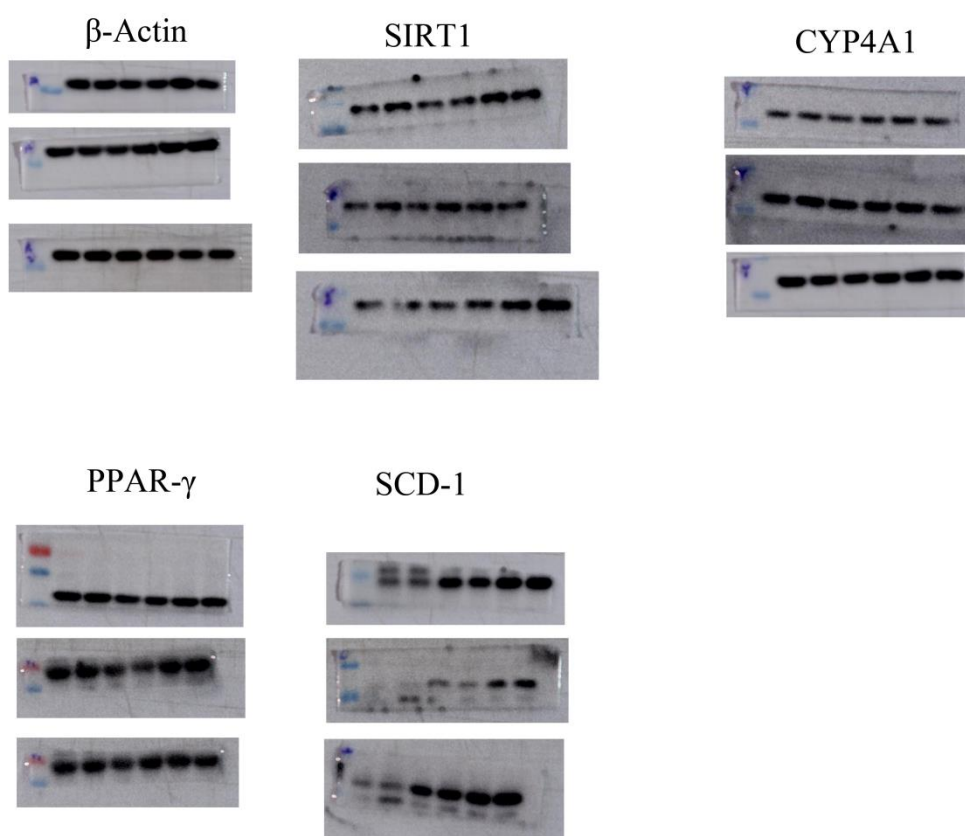

Figure 8

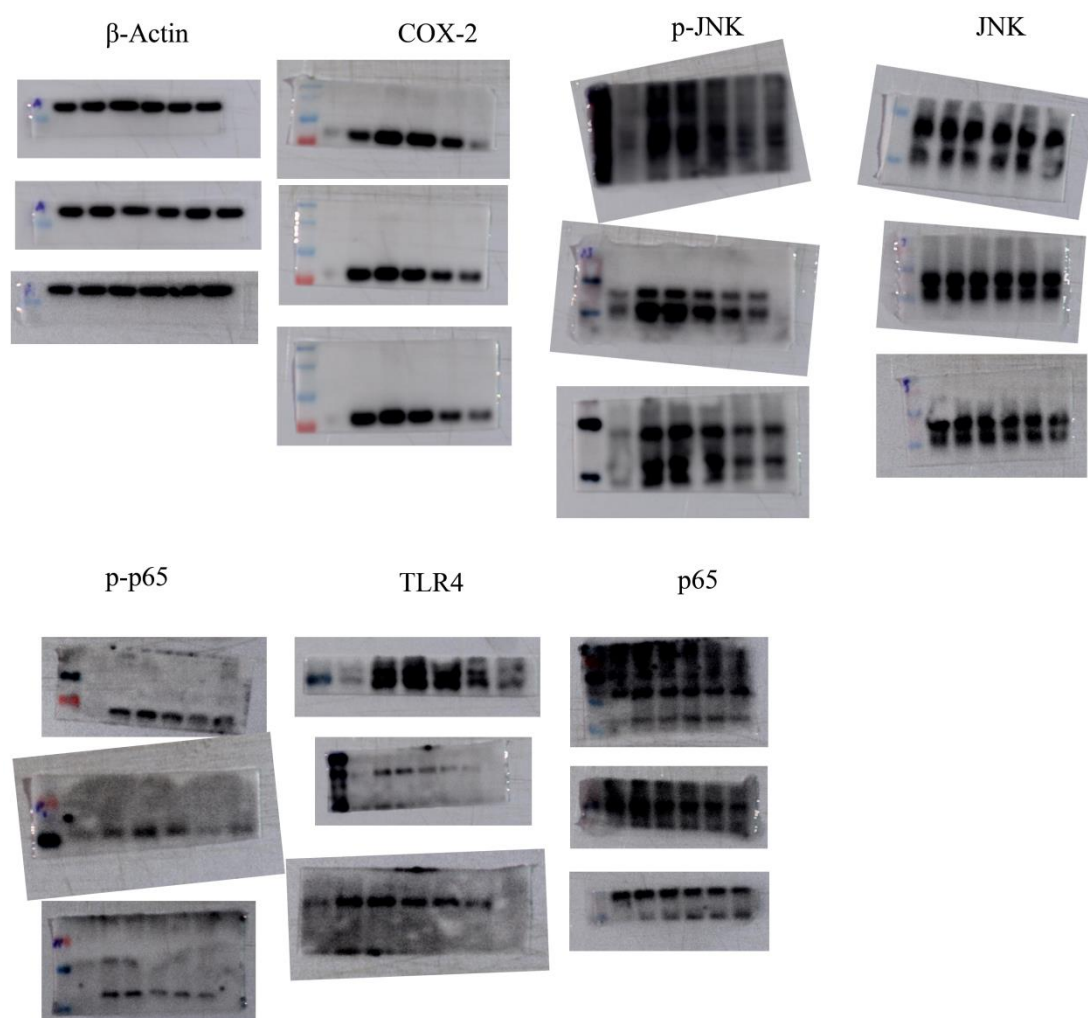

Figure 9

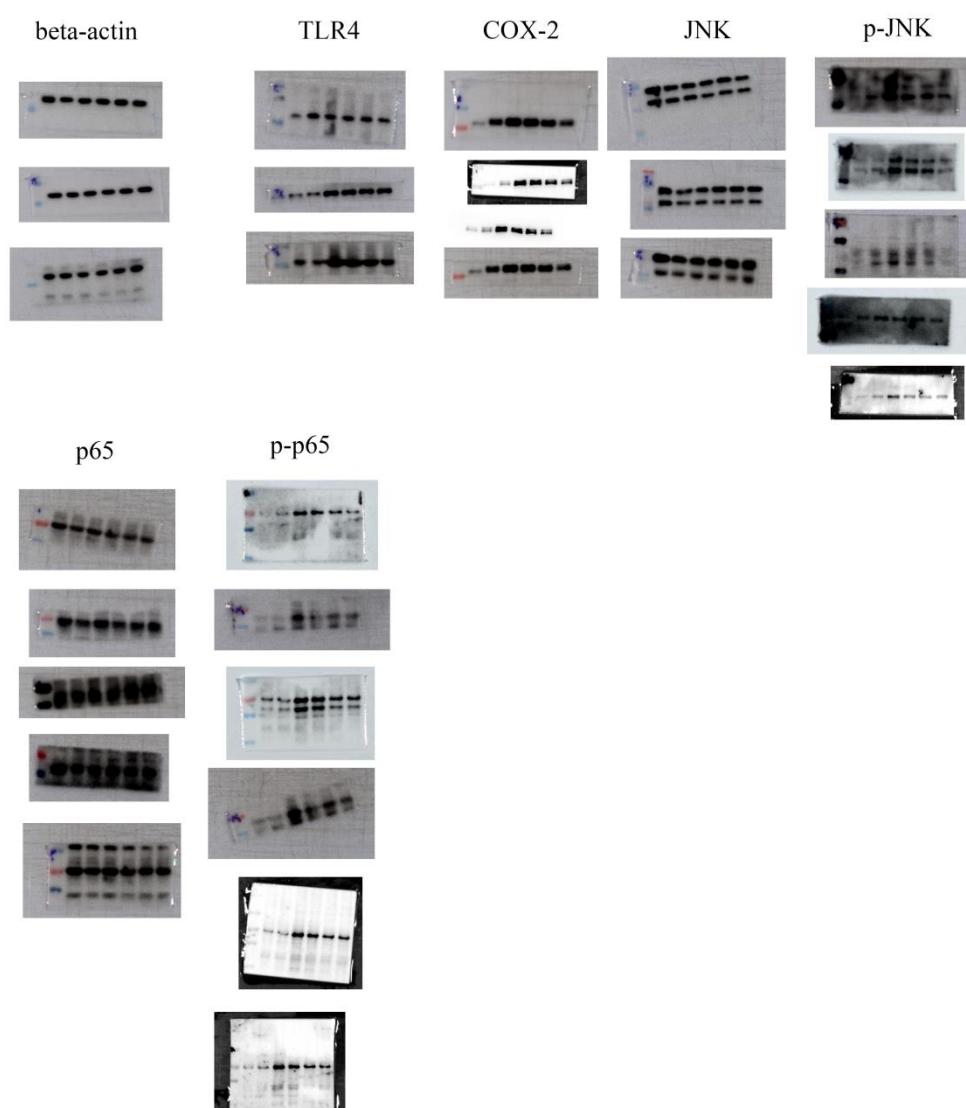

Supplement: Data_Sheet_2.PDF [file Data_Sheet_2.PDF]
